# Supplementary figures and images for: Trials of a drug release platform in near-spherical porous NiTi alloys containing a thermosensitive hydrogel as the inner coating
Source: Royal Society of Chemistry journal article supplement (doi:10.1039/d5ra01925g), 2025-01-01

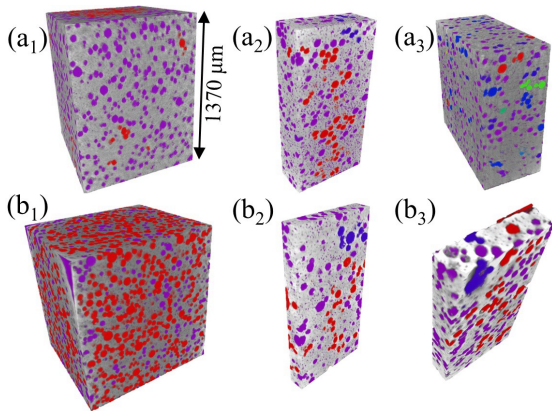

Supplement: d5ra01925g1.pdf [file d5ra01925g1.pdf]
